# Supplementary material for: Hazardous explosive eruptions of a recharging multi-cyclic island arc caldera
Source: Springer Nature journal article supplement (doi:10.1038/s41561-024-01392-7), 2024-03-25
Supplement: MOESM1 [file 41561_2024_1392_MOESM1_ESM.pdf]

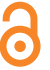

---

# Hazardous explosive eruptions of a recharging multi-cyclic island arc caldera

---

In the format provided by the authors and unedited

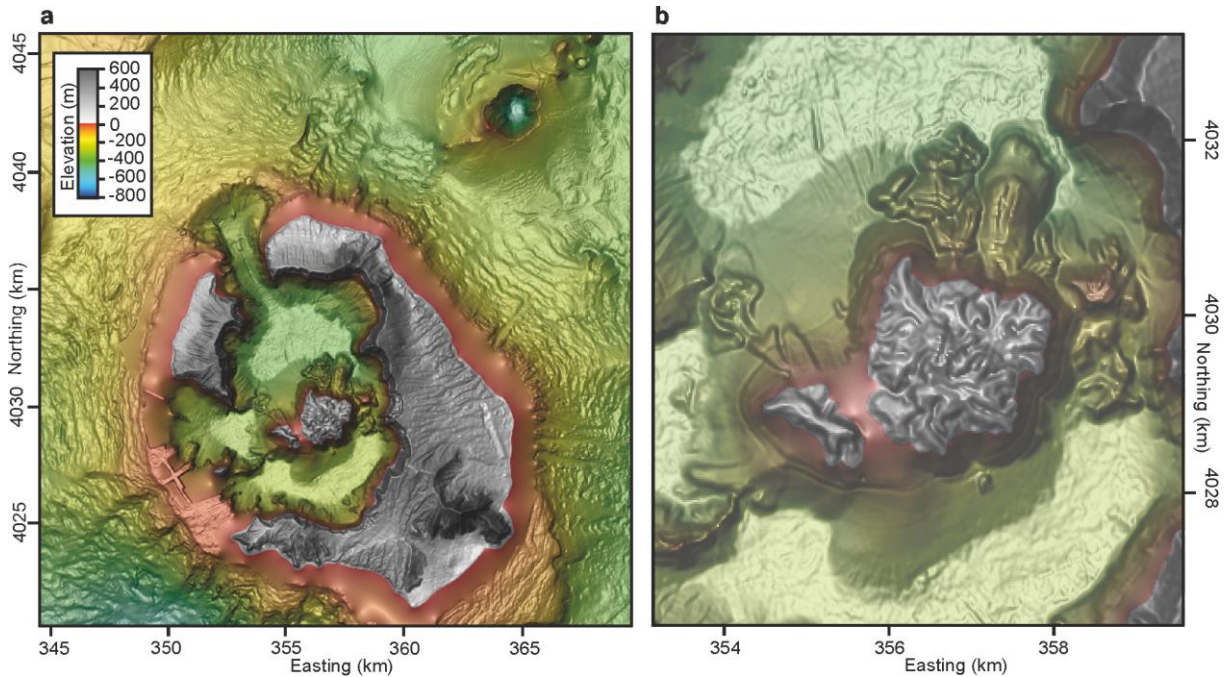

**Supplementary Figure S1: Un-interpreted maps of the Morphology of Santorini Caldera and Kameni Volcano. (a)** Morphological map of Santorini Caldera. **(b)** Zoom of the map shown in (a) highlighting the morphology of the Kameni Volcano.

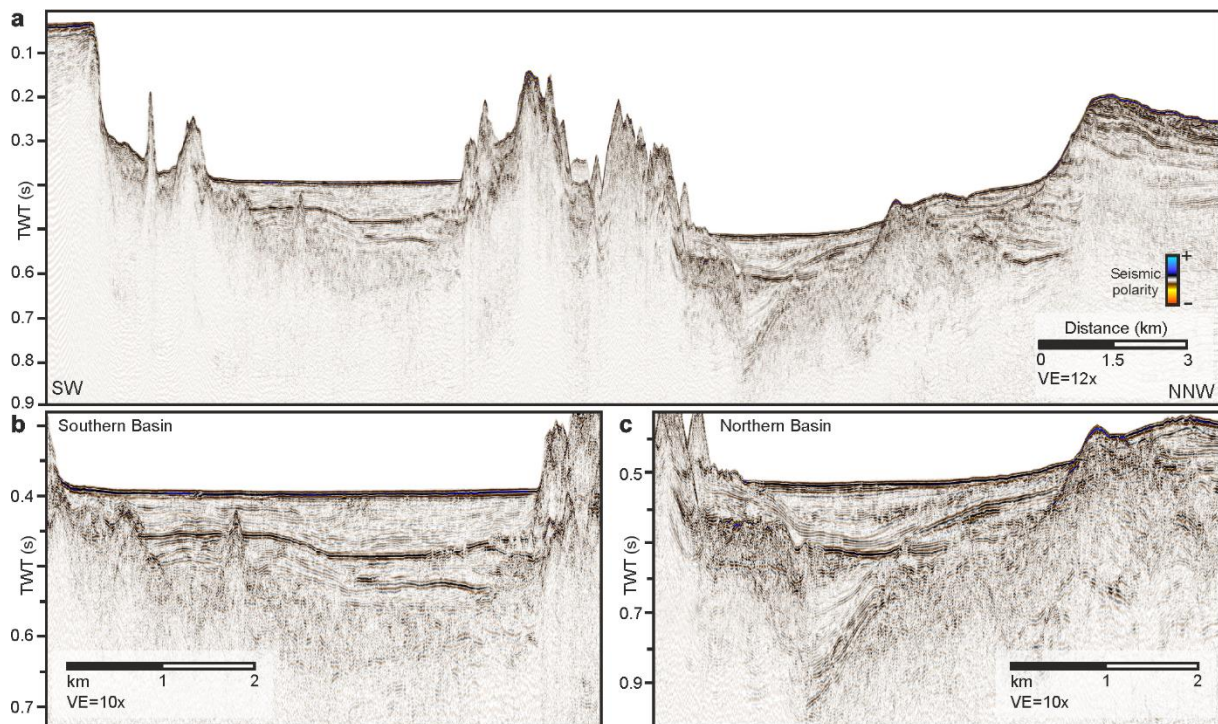

**Supplementary Figure S2: Un-interpreted versions of the seismic images crossing Santorini Caldera.** Un-interpreted versions of the seismic images shown in Figure 3c-e. **(a)** Seismic profile crossing the Santorini Caldera from the western breach across the southern and northern basins towards the northern breach. VE = Vertical Exaggeration. TWT = Two-way travel time. **(b)** Enlargement of the seismic image of the southern basin and **(c)** the northern basin.

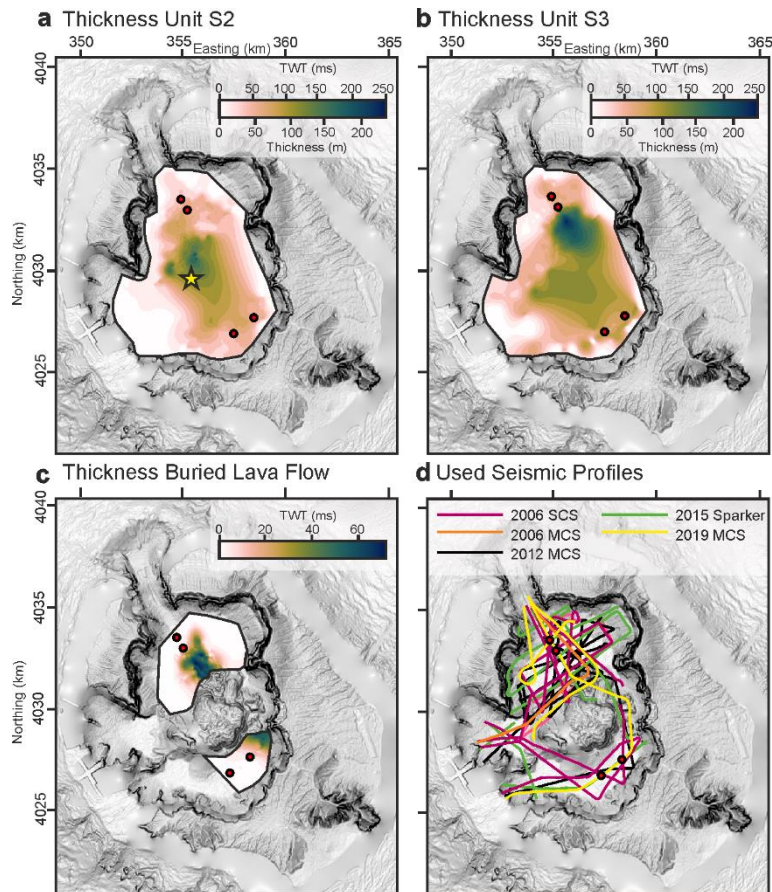

**Supplementary Figure S3: Interpolated Maps of Units S2 and S3 and the Interpreted 197 BCE Lava Flow.** (a) Interpolation of Unit S2 (b) and S3 through Kameni edifice for estimating maximum volumes. Star marks the potential vent location of the 726 CE eruption. (c) Thickness map of the interpreted lava flow at the boundary between Unit S2 and S3. (d) All seismic profiles used for mapping.



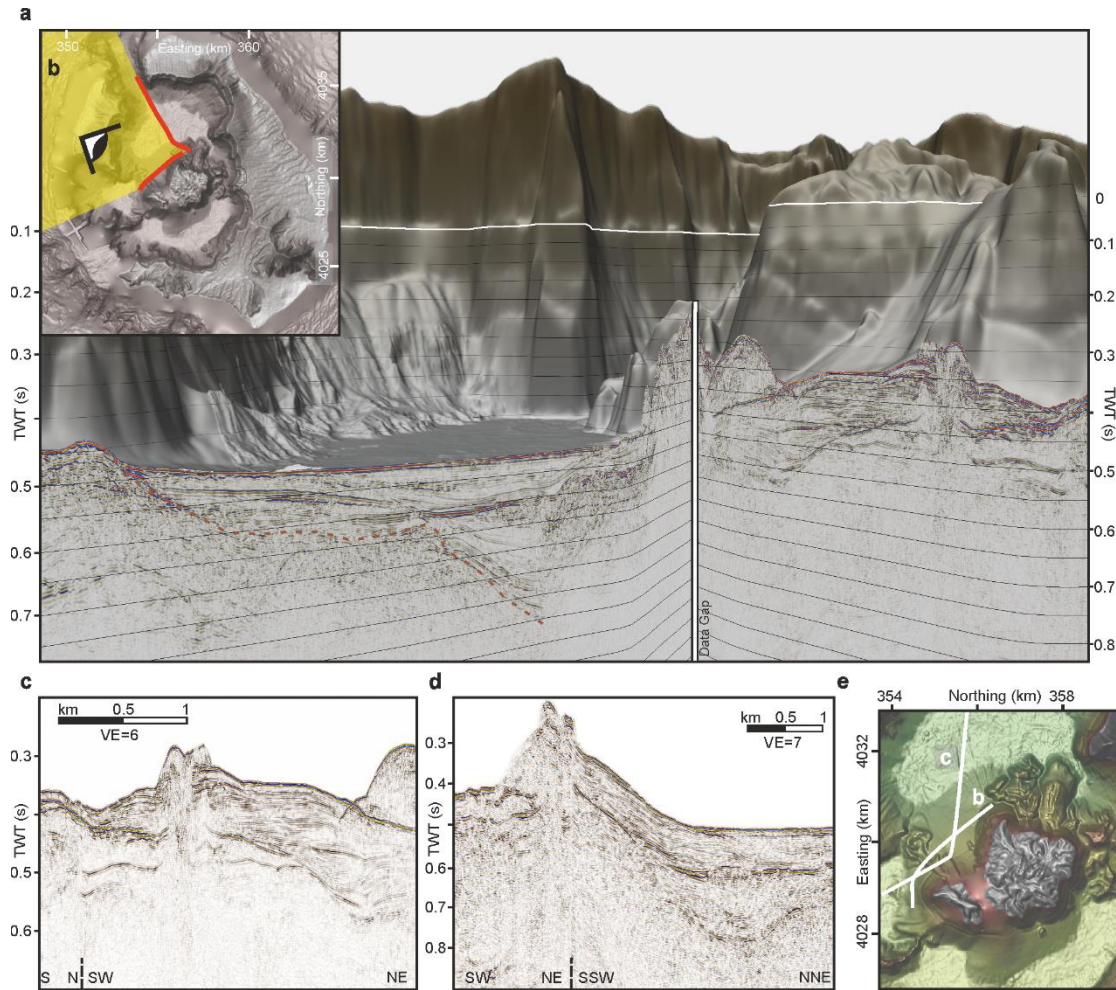

**Supplementary Figure S4: Un-interpreted 3D view of Santorini Caldera and Kameni Volcano.** Un-interpreted versions of the seismic images shown in Figure 5b-d. **(a)** Two crossing seismic lines combined with a cutout of the topographic model of the Santorini Caldera and the Kameni edifice from a vantage point at Therasia (NW Santorini). **(b)** Map highlighting the viewpoint of (a). **(c)** Seismic profile crossing the northern flank of Palea Kameni and Nea Kameni. **(d)** Seismic profile crossing the northern flank of Palea Kameni. **(e)** Map of the Kameni edifice with the location of seismic lines shown in (c) and (d).

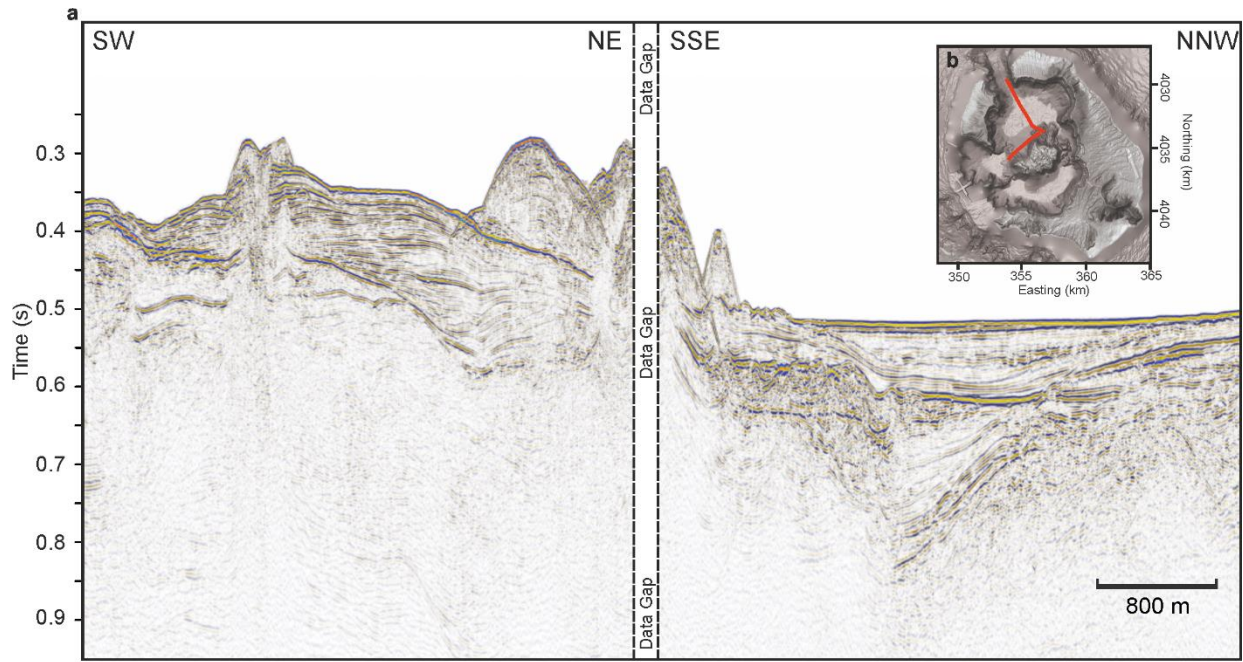

**Supplementary Figure S5: 2D representation of the two profiles used to create the 3D view. (a)** Un-interpreted and two-dimensional version of the seismic profiles used to create Figures 5 and S4. **(b)** Map showing the location of both profiles.

**Supplementary Table 1.** P-wave velocity ( $v_p$ ) measurements for seismic Units S1-3 with the corresponding number of samples. Standard error is given by the values in parentheses.

| Unit | $V_p$ (m/s) | Number of samples |
|------|-------------|-------------------|
| S1   | 1635 (7)    | 389               |
| S2   | 1854 (10)   | 345               |
| S3   | 1810 (29)   | 160               |

**Supplementary Table 2.** Results of moisture and density measurements with standard errors given in parentheses. MGD: Mean grain density.

| Unit | DRE Factor       | Bulk Density ( $\text{kg/m}^3$ ) | Porosity (%) | MGD ( $\text{kg/m}^3$ ) | Number of Samples |
|------|------------------|----------------------------------|--------------|-------------------------|-------------------|
| S1   | 0.314<br>(0.008) | 1484 (16)                        | 64.9 (0.8)   | 2340                    | 36                |
| S2   | 0.265<br>(0.010) | 1365 (18)                        | 63.7 (1.3)   | 1940                    | 31                |
| S3   | 0.492<br>(0.035) | 1839 (63)                        | 48.0 (3.2)   | 2540                    | 18                |

**Supplementary Table 3:** Chemical compositions of marine tephras including the raw data for major elements from gravity core POS513/15 from cruise POS513<sup>1,2</sup>.

| Sample ID                          | Na2O        | K2O         | FeO         | SiO2         | TiO2        | MgO         | CaO         | MnO         | Al2O3        | P2O5        | Total        |
|------------------------------------|-------------|-------------|-------------|--------------|-------------|-------------|-------------|-------------|--------------|-------------|--------------|
| POS513/15_9-11-3°                  | 5.01        | 2.31        | 3.32        | 68.56        | 0.58        | 0.73        | 2.70        | 0.15        | 15.02        | 0.15        | 98.53        |
| POS513/15_9-11-4°                  | 4.77        | 2.23        | 3.81        | 68.63        | 0.63        | 0.76        | 2.62        | 0.25        | 14.80        | 0.11        | 98.61        |
| POS513/15_9-11-5°                  | 5.05        | 2.38        | 3.55        | 69.64        | 0.62        | 0.77        | 2.70        | 0.08        | 14.83        | 0.13        | 99.75        |
| POS513/15_9-11-6                   | 5.11        | 2.24        | 3.77        | 69.39        | 0.63        | 0.75        | 2.66        | 0.18        | 14.88        | 0.12        | 99.74        |
| POS513/15_9-11-7                   | 4.98        | 2.25        | 3.82        | 69.18        | 0.61        | 0.76        | 2.72        | 0.20        | 14.99        | 0.15        | 99.65        |
| POS513/15_9-11-8                   | 4.93        | 2.24        | 3.80        | 68.42        | 0.59        | 0.76        | 2.72        | 0.14        | 14.96        | 0.13        | 98.68        |
| POS513/15_9-11-9                   | 5.12        | 2.27        | 3.55        | 68.42        | 0.61        | 0.76        | 2.75        | 0.12        | 15.19        | 0.11        | 98.91        |
| POS513/15_9-11-10                  | 4.92        | 2.28        | 3.79        | 69.44        | 0.63        | 0.78        | 2.66        | 0.18        | 14.91        | 0.11        | 99.70        |
| POS513/15_9-11-12                  | 4.82        | 2.24        | 3.60        | 69.32        | 0.60        | 0.69        | 2.72        | 0.21        | 15.14        | 0.13        | 99.47        |
| POS513/15_9-11-13                  | 5.07        | 2.23        | 4.12        | 67.42        | 0.58        | 1.11        | 2.97        | 0.17        | 14.53        | 0.12        | 98.31        |
| POS513/15_9-11-14                  | 5.14        | 2.21        | 4.06        | 67.65        | 0.62        | 0.76        | 2.71        | 0.13        | 14.91        | 0.14        | 98.32        |
| <b>POS513/15_9-11_average</b>      | <b>4.99</b> | <b>2.26</b> | <b>3.74</b> | <b>68.73</b> | <b>0.61</b> | <b>0.78</b> | <b>2.72</b> | <b>0.16</b> | <b>14.92</b> | <b>0.13</b> | <b>99.06</b> |
| <i>POS513/15_9-11_stddev</i>       | <i>0.12</i> | <i>0.05</i> | <i>0.23</i> | <i>0.74</i>  | <i>0.02</i> | <i>0.11</i> | <i>0.09</i> | <i>0.05</i> | <i>0.18</i>  | <i>0.01</i> | <i>0.60</i>  |
| Measurements in Clermont*, Taipeh* |             |             |             |              |             |             |             |             |              |             |              |

**Supplementary Table 4:** Chemical compositions of marine tephras including the raw data for major elements from core U1595A\_4H from IODP Expedition 398.

| Sample ID                          | Na2O        | K2O         | FeO         | SiO2         | TiO2        | MgO         | CaO         | MnO         | Al2O3        | P2O5        | Total        |
|------------------------------------|-------------|-------------|-------------|--------------|-------------|-------------|-------------|-------------|--------------|-------------|--------------|
| U1595A_4H-4_37-47_2*               | 5.50        | 2.24        | 3.91        | 68.28        | 0.58        | 0.74        | 2.88        | 0.16        | 14.95        | 0.10        | 99.33        |
| U1595A_4H-4_37-47_3*               | 5.68        | 2.27        | 4.18        | 68.92        | 0.60        | 0.72        | 2.70        | 0.13        | 15.22        | 0.09        | 100.51       |
| U1595A_4H-4_37-47_12               | 5.32        | 2.29        | 3.94        | 69.18        | 0.65        | 0.70        | 2.69        | 0.16        | 15.07        | 0.11        | 100.10       |
| U1595A_4H-4_37-47_13               | 5.47        | 2.21        | 3.87        | 68.47        | 0.57        | 0.63        | 2.82        | 0.18        | 14.83        | 0.09        | 99.14        |
| U1595A_4H-4_37-47_14               | 5.39        | 2.20        | 4.15        | 68.34        | 0.63        | 0.71        | 2.79        | 0.10        | 14.94        | 0.11        | 99.36        |
| U1595A_4H-4_37-47_15               | 5.53        | 2.30        | 4.11        | 68.25        | 0.62        | 0.67        | 2.60        | 0.11        | 15.12        | 0.16        | 99.47        |
| U1595A_4H-4_37-47_17               | 5.37        | 2.24        | 4.00        | 68.41        | 0.62        | 0.73        | 2.77        | 0.21        | 15.00        | 0.15        | 99.50        |
| U1595A_4H-4_37-47_19               | 5.41        | 2.26        | 3.79        | 68.06        | 0.59        | 0.73        | 2.65        | 0.17        | 14.86        | 0.14        | 98.66        |
| U1595A_4H-4_37-47_20               | 5.48        | 2.22        | 3.75        | 67.51        | 0.63        | 0.75        | 2.56        | 0.15        | 14.87        | 0.10        | 98.01        |
| U1595A_4H-4_37-47_21               | 5.41        | 2.25        | 3.56        | 68.44        | 0.56        | 0.70        | 2.65        | 0.16        | 15.06        | 0.14        | 98.94        |
| U1595A_4H-4_37-47_22               | 5.09        | 2.28        | 3.90        | 68.18        | 0.66        | 0.73        | 2.65        | 0.11        | 15.10        | 0.16        | 98.87        |
| U1595A_4H-4_37-47_23               | 5.36        | 2.26        | 3.87        | 69.09        | 0.64        | 0.66        | 2.71        | 0.16        | 14.84        | 0.13        | 99.73        |
| U1595A_4H-4_37-47_24               | 5.27        | 2.28        | 4.07        | 66.49        | 0.58        | 0.63        | 2.61        | 0.16        | 15.33        | 0.17        | 97.59        |
| U1595A_4H-4_37-47_L1°              | 5.37        | 2.24        | 4.00        | 68.41        | 0.62        | 0.73        | 2.77        | 0.21        | 15.00        | 0.15        | 99.50        |
| U1595A_4H-4_37-47_L2°              | 5.41        | 2.26        | 3.79        | 68.06        | 0.59        | 0.73        | 2.65        | 0.17        | 14.86        | 0.14        | 98.66        |
| U1595A_4H-4_37-47_L3°              | 5.48        | 2.22        | 3.75        | 67.51        | 0.63        | 0.75        | 2.56        | 0.15        | 14.87        | 0.10        | 98.01        |
| U1595A_4H-4_37-47_L4               | 5.41        | 2.25        | 3.56        | 68.44        | 0.56        | 0.70        | 2.65        | 0.16        | 15.06        | 0.14        | 98.94        |
| U1595A_4H-4_37-47_L7               | 5.09        | 2.28        | 3.90        | 68.18        | 0.66        | 0.73        | 2.65        | 0.11        | 15.10        | 0.16        | 98.87        |
| U1595A_4H-4_37-47_L8               | 5.36        | 2.26        | 3.87        | 69.09        | 0.64        | 0.66        | 2.71        | 0.16        | 14.84        | 0.13        | 99.73        |
| U1595A_4H-4_37-47_L9               | 5.27        | 2.28        | 4.07        | 66.49        | 0.58        | 0.63        | 2.61        | 0.16        | 15.33        | 0.17        | 97.59        |
| <b>U1595A_4H-4_37-47_average</b>   | <b>5.38</b> | <b>2.25</b> | <b>3.90</b> | <b>68.19</b> | <b>0.61</b> | <b>0.70</b> | <b>2.68</b> | <b>0.15</b> | <b>15.01</b> | <b>0.13</b> | <b>99.03</b> |
| <i>U1595A_4H-4_37-47_std</i>       | <i>0.14</i> | <i>0.03</i> | <i>0.17</i> | <i>0.73</i>  | <i>0.03</i> | <i>0.04</i> | <i>0.09</i> | <i>0.03</i> | <i>0.16</i>  | <i>0.03</i> | <i>0.78</i>  |
| Measurements in Clermont*, Taipei° |             |             |             |              |             |             |             |             |              |             |              |

**Supplementary Table 5:** Chemical compositions of marine tephras including the raw data for major elements from core U1595A\_5H from IODP Expedition 398.

| Sample ID                          | Na2O        | K2O         | FeO         | SiO2         | TiO2        | MgO         | CaO         | MnO         | Al2O3        | P2O5        | Total        |
|------------------------------------|-------------|-------------|-------------|--------------|-------------|-------------|-------------|-------------|--------------|-------------|--------------|
| U1595A_5H-3_90-100_5               | 5.33        | 2.25        | 3.98        | 67.87        | 0.61        | 0.77        | 2.65        | 0.23        | 15.23        | 0.13        | 99.04        |
| U1595A_5H-3_90-100_8               | 5.08        | 2.31        | 4.60        | 68.32        | 0.63        | 0.75        | 2.76        | 0.11        | 15.48        | 0.12        | 100.17       |
| U1595A_5H-3_90-100_18              | 5.16        | 2.27        | 3.69        | 68.03        | 0.59        | 0.70        | 2.54        | 0.16        | 14.91        | 0.11        | 98.16        |
| U1595A_5H-3_90-100_20              | 5.46        | 2.23        | 3.82        | 68.21        | 0.60        | 0.75        | 2.79        | 0.22        | 15.35        | 0.08        | 99.51        |
| U1595A_5H-3_90-100_23              | 5.35        | 2.22        | 3.96        | 64.93        | 0.60        | 0.69        | 2.71        | 0.25        | 14.88        | 0.12        | 95.71        |
| U1595A_5H-3_90-100_25              | 5.32        | 2.25        | 3.39        | 68.02        | 0.65        | 0.69        | 2.83        | 0.21        | 15.26        | 0.16        | 98.78        |
| U1595A_5H-3_90-100_L1°             | 5.16        | 2.27        | 3.69        | 68.03        | 0.59        | 0.70        | 2.54        | 0.16        | 14.91        | 0.11        | 98.16        |
| U1595A_5H-3_90-100_L2°             | 5.46        | 2.23        | 3.82        | 68.21        | 0.60        | 0.75        | 2.79        | 0.22        | 15.35        | 0.08        | 99.51        |
| U1595A_5H-3_90-100_L3°             | 5.35        | 2.22        | 3.96        | 64.93        | 0.60        | 0.69        | 2.71        | 0.25        | 14.88        | 0.12        | 95.71        |
| U1595A_5H-3_90-100_L4              | 5.32        | 2.25        | 3.39        | 68.02        | 0.65        | 0.69        | 2.83        | 0.21        | 15.26        | 0.16        | 98.78        |
| U1595A_5H-3_90-100_L5°             | 5.32        | 2.25        | 3.39        | 68.02        | 0.65        | 0.69        | 2.83        | 0.21        | 15.26        | 0.16        | 98.78        |
| <b>U1595A_5H-3_90-100_average</b>  | <b>5.30</b> | <b>2.25</b> | <b>3.79</b> | <b>67.51</b> | <b>0.62</b> | <b>0.72</b> | <b>2.73</b> | <b>0.20</b> | <b>15.16</b> | <b>0.12</b> | <b>98.39</b> |
| <i>U1595A_5H-3_90-100_std</i>      | <i>0.12</i> | <i>0.03</i> | <i>0.35</i> | <i>1.28</i>  | <i>0.02</i> | <i>0.03</i> | <i>0.11</i> | <i>0.04</i> | <i>0.22</i>  | <i>0.03</i> | <i>1.45</i>  |
| Measurements in Clermont*, Taipei° |             |             |             |              |             |             |             |             |              |             |              |

**Supplementary Table 6:** Chemical compositions of marine tephras including the trace element data of individual glass shard measurements.

| Sample ID                          | Rb85  | Sr88   | Y89   | Zr90    | Nb93  | Cs133  | Ba137  | La139  | Ce140  | Pr141 | Nd146 | Sm147 | Eu153  | Gd157 | Tb159  | Dy163 | Ho165 | Er166 | Tm169  | Yb172 | Lu175 | Hf178 | Ta181  | Pb208  | Th232  | U238  |  |
|------------------------------------|-------|--------|-------|---------|-------|--------|--------|--------|--------|-------|-------|-------|--------|-------|--------|-------|-------|-------|--------|-------|-------|-------|--------|--------|--------|-------|--|
| POSS13/15_9-11-3°                  | 79.28 | 122.31 | 43.36 | 236.45  | 9.73  | 2.31   | 433.00 | 24.65  | 53.84  | 6.36  | 22.89 | 6.22  | 1.48   | 6.79  | 1.02   | 6.88  | 1.60  | 4.54  | 0.67   | 4.67  | 0.80  | 5.97  | 0.67   | 14.51  | 13.06  | 4.64  |  |
| POSS13/15_9-11-4°                  | 79.98 | 124.03 | 44.05 | 241.54  | 8.85  | 2.25   | 441.90 | 25.10  | 50.56  | 6.18  | 23.66 | 5.60  | 1.42   | 6.39  | 1.18   | 7.37  | 1.54  | 4.71  | 0.79   | 5.45  | 0.70  | 6.41  | 0.64   | 13.96  | 13.62  | 4.52  |  |
| POSS13/15_9-11-5°                  | 73.41 | 120.14 | 38.01 | 207.64  | 8.21  | 2.11   | 375.99 | 21.79  | 46.30  | 5.27  | 21.44 | 4.86  | 1.12   | 6.08  | 0.86   | 6.44  | 1.44  | 4.29  | 0.49   | 4.55  | 0.77  | 5.77  | 0.53   | 12.90  | 12.27  | 3.74  |  |
| <b>POSS13/15_9-11_average</b>      | 77.56 | 122.16 | 41.81 | 228.54  | 8.93  | 2.22   | 416.96 | 23.85  | 50.23  | 5.94  | 22.66 | 5.56  | 1.34   | 6.42  | 1.02   | 6.90  | 1.53  | 4.51  | 0.65   | 4.89  | 0.76  | 6.05  | 0.61   | 13.79  | 12.98  | 4.30  |  |
| <i>POSS13/15_9-11_stddev</i>       | 3.61  | 1.95   | 3.31  | 18.28   | 0.76  | 0.10   | 35.76  | 1.80   | 3.78   | 0.58  | 1.13  | 0.68  | 0.19   | 0.36  | 0.16   | 0.47  | 0.08  | 0.21  | 0.15   | 0.49  | 0.05  | 0.33  | 0.07   | 0.82   | 0.68   | 0.49  |  |
| U1595A_4H-4_37-47_2*               | 81.83 | 128.61 | 44.99 | 244.71  | 9.36  | 2.344  | 458.25 | 26.5   | 54.41  | 6.1   | 25.56 | 6.24  | 1.498  | 6.62  | 1.075  | 7.71  | 1.73  | 5.11  | 0.779  | 5.29  | 0.82  | 6.14  | 0.744  | 15.2   | 14.51  | 4.58  |  |
| U1595A_4H-4_37-47_3*               | 73.96 | 120.33 | 44.28 | 238.19  | 8.81  | 2.12   | 438.12 | 25.46  | 52.21  | 5.95  | 24.43 | 5.89  | 1.391  | 6.44  | 1.03   | 7.35  | 1.645 | 5.05  | 0.753  | 5.22  | 0.801 | 6.08  | 0.657  | 13.58  | 13.87  | 4.26  |  |
| U1595A_4H-4_37-47_L1*              | 75.72 | 134.81 | 47.97 | 258.99  | 8.66  | 2.5    | 434.55 | 27.2   | 53.02  | 6.21  | 27.1  | 7.57  | 1.35   | 7.31  | 1.19   | 9.04  | 2     | 5.73  | 0.864  | 6.68  | 0.834 | 7.34  | 0.572  | 17.57  | 15.5   | 4.53  |  |
| U1595A_4H-4_37-47_L2*              | 77.32 | 128.29 | 47.8  | 259.83  | 8.8   | 2.29   | 449.29 | 28.78  | 51.7   | 5.59  | 28.3  | 6.9   | 1.08   | 8.29  | 1.47   | 7.11  | 1.69  | 4.13  | 0.57   | 6.86  | 0.85  | 8     | 0.54   | 14.36  | 15.89  | 4.42  |  |
| U1595A_4H-4_37-47_L3*              | 90.72 | 127.31 | 48.26 | 263.05  | 10.17 | 2.69   | 455.69 | 27.35  | 54.42  | 6.42  | 26.21 | 7.14  | 1.55   | 7.27  | 1.156  | 7.9   | 1.95  | 4.96  | 0.853  | 5.25  | 0.99  | 7.32  | 0.735  | 20.06  | 15.24  | 5.07  |  |
| <b>U1595A_4H-4_37-47_average</b>   | 79.91 | 127.87 | 46.66 | 252.954 | 9.16  | 2.3888 | 447.18 | 27.058 | 53.152 | 6.054 | 26.32 | 6.748 | 1.3738 | 7.186 | 1.1842 | 7.822 | 1.803 | 4.996 | 0.7638 | 5.86  | 0.859 | 6.976 | 0.6496 | 16.154 | 15.002 | 4.572 |  |
| <i>U1595A_4H-4_37-47_std</i>       | 6.71  | 5.15   | 1.87  | 10.86   | 0.62  | 0.22   | 10.50  | 1.22   | 1.25   | 0.31  | 1.47  | 0.68  | 0.18   | 0.73  | 0.17   | 0.75  | 0.16  | 0.57  | 0.12   | 0.83  | 0.08  | 0.84  | 0.09   | 2.65   | 0.81   | 0.30  |  |
| U1595A_5H-3_90-100_L1°             | 76.69 | 120.73 | 46.26 | 254.7   | 8.6   | 2.4    | 424.83 | 26.58  | 50.07  | 6.58  | 24.63 | 5.53  | 1.53   | 6.82  | 1.01   | 7.87  | 1.65  | 5.26  | 0.825  | 5.04  | 0.838 | 7.24  | 0.585  | 13.47  | 15.16  | 4.34  |  |
| U1595A_5H-3_90-100_L2°             | 76.37 | 120.33 | 47.35 | 255.42  | 9.39  | 2.23   | 411.42 | 26.58  | 50.74  | 6.21  | 26.92 | 7.31  | 1.8    | 6.6   | 1.3    | 7.03  | 1.73  | 4.7   | 0.76   | 5.64  | 0.682 | 7.01  | 0.709  | 14.57  | 14.59  | 3.96  |  |
| U1595A_5H-3_90-100_L3°             | 73.94 | 119.37 | 46.37 | 248.54  | 8.91  | 2.38   | 424.86 | 26.32  | 52.11  | 6.11  | 25.8  | 4.99  | 1.55   | 7.17  | 1.11   | 8.65  | 1.6   | 4.87  | 0.859  | 5.66  | 0.822 | 7.29  | 0.702  | 14.15  | 14.09  | 4.27  |  |
| U1595A_5H-3_90-100_L5°             | 80.86 | 130.06 | 52.05 | 278.32  | 9.42  | 1.98   | 465.21 | 29.48  | 56.43  | 6.88  | 27.91 | 6.6   | 1.38   | 7.36  | 1.37   | 8.6   | 1.88  | 5.02  | 0.727  | 5.72  | 1     | 7.2   | 0.633  | 14.65  | 16.58  | 4.18  |  |
| <b>U1595A_5H-3_90-100_average</b>  | 76.97 | 122.62 | 48.01 | 259.25  | 9.08  | 2.25   | 431.58 | 27.24  | 52.34  | 6.45  | 26.32 | 6.11  | 1.57   | 6.99  | 1.20   | 8.04  | 1.72  | 4.96  | 0.79   | 5.52  | 0.84  | 7.19  | 0.66   | 14.21  | 15.11  | 4.19  |  |
| <i>U1595A_5H-3_90-100_std</i>      | 2.87  | 4.99   | 2.74  | 13.09   | 0.40  | 0.19   | 23.30  | 1.50   | 2.86   | 0.35  | 1.42  | 1.04  | 0.17   | 0.34  | 0.17   | 0.76  | 0.12  | 0.24  | 0.06   | 0.32  | 0.13  | 0.12  | 0.06   | 0.54   | 1.08   | 0.17  |  |
| Measurements in Clermont*, Taipei° |       |        |       |         |       |        |        |        |        |       |       |       |        |       |        |       |       |       |        |       |       |       |        |        |        |       |  |



## REFERENCES

1. Kutterolf, S., Freundt, A., Hansteen, T., Dettbarn, R., Hampel, F., Sievers, C., ... & Friedrichs, B. (2021). The Medial Offshore Record of Explosive Volcanism Along the Central to Eastern Aegean Volcanic Arc: 1. Tephrostratigraphic Correlations. *Geochemistry, Geophysics, Geosystems*, 22(12).
2. Kutterolf, S., Freundt, A., Druitt, T. H., McPhie, J., Nomikou, P., Pank, K., ... & Allen, S. R. (2021). The medial offshore record of explosive volcanism along the central to eastern Aegean Volcanic Arc: 2. Tephra ages and volumes, eruption magnitudes, and marine sedimentation rate variations. *Geochemistry, Geophysics, Geosystems*, 22(12), e2021GC010011.
